# Supplementary material for: Placenta-derived exosomes mediate the intergenerational transmission of depression by regulating WNT2B /β-catenin signaling
Source: Research Square preprint supplement (doi:10.21203/rs.3.rs-6587812/v1), 2025-05-30
Supplement: Supplementary file 1 [file 97da6b07ea3db8dd4e0618f0.docx]

1. **Materials and Methods**

**2.1 Subjects** **and sample preparation**

The subjects were enrolled from the hospitalized full-term pregnant women,within 37-42 weeks of gestation, waiting for delivery from the department of gynecology and obstetrics of the First Affiliated Hospital of Xi'an Jiaotong University between January 2017 and August 2023. The Hamilton Rating Scale for Depression (HAMD) was applied to assess maternal depressive symptoms. According to the scores of HAMD and mothers’ choice willings, mothers were sorted into a normal group (n=95) and a depression group (n=87). The inclusion criteria were as follows: 1. Aged 18-40 years; 2. First-time mother, full-term and singleton pregnancy; 3. Without any maternal medical illness, hypertension, diabetes mellitus or other severe diseases. After delivery, newborn infants were automatically assigned to the same group as their mothers. The exclusion criteria of newborn infants were as follows: 1. Apgar score < 8 at the first, fifth, and tenth minutes in newborn infants after birth; 2.The birth with intrapartum complications; 3. Preterm infants (< 37 weeks gestation) and multiple births were excluded; 4. Infants too ill to undergo neonatal examination. 13 among eligible mother-infant dyads, including 8 of depression group and 5 of control group, were excluded or lost to follow-up over time. A retention rate was 92.86%. The reasons they were lost to follow-up were because mothers did not wish to have a blood draw or they moved to another place to live. According to the mother’s group，babies were grouped automatically. A total of 169 mother-newborn pairs were recruited, and there were control group (n=90), depression group (n=79).

**2.2 Hamilton Depression Scale (HAMD)**

The 24-item HAMD was used to assess primary depression. The subjects with the score of HAMD >20 were assigned to the depression group. The subjects with the score of HAMD < 8 were assigned to the control group.

**2.3 Assessment of neurobehavioral development by NBAS in newborn infants**

The NBAS was used to assess neurobehavioral development in newborn infants aged 21-27 days. The NBAS was administered to the newborn infants. According to established scoring criteria, NBAS behavioral items are assigned a score ranging from 1 to 9, with a higher score typically indicating better performance and a lower score indicating poorer performance for many items, such as some motor development items(general tone, motor maturity, pull-to-sit, defensive movement, activity). However, a higher score indicates poor performance for some items, such as the general tone of motor development items. The researcher administered the complete NBAS and the scale was recorded and scored in the standard format described in the NBAS manual. The clusters were administered in the order recommended by the NBAS manual.

**2.4 Behavioral test**

**1) Sucrose preference test (SPF)**

All the offspring rats aged 30 days were given 200 ml 2% sucrose solution (w/v) along with drinking water at the same time. Prohibit drinking and drinking water for three hours before the experiment. Total consumption was determined by weighing the sucrose solution bottle before and after each 2h session. To prevent rat inertia, the sucrose solution and water bottle should be alternated in position every 1 h. Experiment three times according to this method. With the sucrose preference degree being a measure of depression behavior, the difference compared to the experimental group was then analyzed. Sucrose preference (percent) was calculated as follows: Sucrose preference degree = sucrose solution consumption / (water consumption + sucrose solution consumption)×100%.

**2) Forced Swimming Test (FST)**

The FST was conducted according to previous reports. Under low light conditions, each rat was individually placed into a Perspex cylinder (diameter 18 cm, height 40 cm) filled with 25 °C water to a height of 30 cm for 15 min as pre-test. After 24 h later, the procedure was repeated, but on this occasion the duration that the rats remained immobility during a 5-min observation period was recorded. Rats spending more immobile time in the FST have been characterized as reflecting increased depressive-like behavior.

**2.5 Isolation of the hippocampus**

After the offspring rats was deeply anesthetized, the brain was carefully dissected out from the skull and was divided into two parts according to the sagittal axis. One part of the brain was used to RT-PCR and Western Blot Analysis. The hippocampus was isolated according to Dissection of rodent brain regions with minor modification and stored in -80 °C refrigerator. The other part of the brain was used to immunohistochemistry.

**2.6 RNA Isolation and RT-PCR**

According to the manufacturer’s instructions, total RNA was extracted from hippocampus tissue by the RNA fast 200 RNA kit (Xianfeng Biotech, China). The method of RNA isolation and RT-PCR were performed as previously described. The sequences for PCR primers were as follows: The lanes were calculated by the Quantity One software.

**2.7 Western Blot Analysis**

The method of Western blotting was performed as previously described. Primary antibodies used were as follows: rabbit anti-WNT2B antibody (1:1000, Abcam, Cambridge, UK), rabbit anti-β-catenin (1:800, Abcam, Cambridge, UK), and mouse anti-β-actin (1:1000, Cell Signaling Technology). The lanes were calculated by the Quantity One software.

**2.8 Immunohistochemistry**

After finishing the behavioral test, the offspring rats received consecutive i.p. injections of 50 mg/kg bromodeoxyuridine (BrdU) (Sigma Aldrich) at twice times every day for 5 consecutive days and were sacrificed 12 hours after the last injection. The brain was removed and fixed in 4% paraformaldehyde (PH7.4) for 24 h at 4 °C and then immersed in 15%, 20%, and 30% sucrose overnight, respectively. Serial sections (16μm/section) were cut coronally through the entire anteroposterior extension of the hippocampus with a freezing microtome. Sections were washed three times for 10 min in PBS and 0.3% Triton X-100 (PBST), treated with 1% H2O2 (wt/vol) in 1:1 PBS and methanol for 15 min, incubated in 10% normal donkey serum in PBST for 2 hours, and then incubated overnight at 4°C in primary antibody in PBST +mouse anti-BrdU(1:100, Abcam, British), rabbit anti-Neun (1:100, Abcam, British). The next day, sections were washed three times for 10 min in PBST and incubated in secondary antibody anti- mouse CY3 (Abbkine, China) in PBST + 10% NDS for 2 h at 21-26°C. Before coverslips were mounted, DAPI (1:10, Sigma) was incubated for 5min. Images were acquired using a fluorescence microscope with a 40×objective (Nikon Eclipse Ti). We counted the total number of BrdU+/NeuN+ cells in the dentate granule cell layer (GCL) and the dentate SGZ in a 1/6 series of sections (120 μm apart) per group. The fluorescence images were analyzed using Image-Pro Plus software (Image-Pro Plus software 6.0, USA).

1. **Table**

**Table 1. Demographic characteristics in pregnant women**

|  | Normal group  (n=90) | Depression group  (n=79) | Values | *P* value |
| --- | --- | --- | --- | --- |
| Maternal Age（mean±SD） | 28.52±3.38 | 29.10±3.71 | T=-1.062 | 0.29 |
| Gestational age（mean±SD） | 39.03±1.48 | 38.67±1.17 | T=1.783 | 0.076 |
| Residence |  |  | χ2=1.761 | 0.185 |
| Rural area | 30(30%) | 19(25.19%) |  |  |
| Urban area | 60(70%) | 60(74.81%) |  |  |
| Education |  |  | χ2=5.624 | 0.131 |
| Middle school | 30(33.33%) | 17(21.52%) |  |  |
| High school | 28(31.11%) | 22(27.85%) |  |  |
| Bachelor's degree | 25(27.78%) | 35(44.30%) |  |  |
| Higher than bachelor's degree | 7(7.78%) | 5(6.33%) |  |  |
| Family income |  |  | χ2=0.214 | 0.898 |
| <2000 RMB/m/person | 18(20.0%) | 14(17.72%) |  |  |
| 2000–5000 RMB/m/person | 47(52.22%) | 41(51.90%) |  |  |
| >5000Yuan/m/ person | 25(27.78%) | 24(30.38%) |  |  |
| Professional status |  |  | χ2=1.197 | 0.274 |
| Employed | 63(70.00%) | 49(62.03%) |  |  |
| Unemployed | 27(30.00%) | 30(37.97%) |  |  |
| Matrimonial status |  |  | χ2=0.134 | 0.714 |
| Married/cohabiting | 83(92.22%) | 74(93.67%) |  |  |
| Single | 7(7.78%) | 5(6.33%) |  |  |

**Table 2. Neonatal demographic characteristics**

|  | Normal group  (n=90) | Depression group  (n=79) | *Values* | *P value* |
| --- | --- | --- | --- | --- |
| Apgar index: 1st min  （mean±SD） | 8.42±0.62 | 8.25±0.82 | T=1.52 | 0.13 |
| Birth weight (g)（mean±SD） | 3331±350 | 3210±407 | T=1.685 | 0.094 |
| Type of delivery |  |  | χ2=2.303 | 0.129 |
| Vaginal delivery | 56(62.22%) | 40(50.63%) |  |  |
| Cesarean delivery | 34(37.78%) | 39(49.37%) |  |  |
| Gender |  |  | χ2=0.11 | 0.74 |
| Male | 49(54.44%) | 41(51.90%) |  |  |
| Female | 41(45.56%) | 38(48.10%) |  |  |
